# Supplementary material for: A new cyanoaromatic photosensitizer vs. 9,10-dicyanoanthracene: systematic comparison of the photophysical properties
Source: Royal Society of Chemistry journal article supplement (doi:10.1039/c002705g), 2010-01-01
Supplement: c002705g.pdf [file c002705g.pdf]

## A new cyanoaromatic photosensitizer vs. 9,10-dicyanoanthracene: systematic comparison of the photophysical properties

Sylvie Blanc,<sup>1</sup> Thierry Pigot,<sup>1</sup> Cyril Cugnet,<sup>1</sup> Ross Brown<sup>1</sup> and Sylvie Lacombe<sup>\*1</sup>

<sup>a</sup>UMR CNRS 5254, Université de Pau, IPREM, Hélioparc, 2 rue du Président Angot, 64053, Pau cedex 9, France. Fax: 33 559 407622; Tel: 33 559 407579 E-mail: [sylvie.lacombe@univ-pau.fr](mailto:sylvie.lacombe@univ-pau.fr)

- **Figure S1** : Excitation ( $\lambda_{em} = 420$  nm) and emission spectra ( $\lambda_{ex} = 260, 355, 380, 400, 400, 400, 410$  nm in acetonitrile, methanol, toluene, cyclohexane, ethanol, chloroform and hexane) of DCA at room temperature.
- **Figure S2**: Electronic absorption spectra of DCA in ethanol/water mixtures (v/v) at room temperature.
- **Figure S3**: Absorption spectra of **1** in ethanol/water mixture (v/v) at room temperature, ( $l = 1$  cm).
- **Figure S4**: Absorption and excitation ( $\lambda_{em} = 420$  nm) and spectra of **1** in hexane/methanol mixtures ( $[1] = 6.0 \times 10^{-6}$  M,  $l = 1$  cm).
- **Figure S5**: Excitation spectra ( $\lambda_{em} = 414, 440, 440, 466, 490, 490$  and  $550$  nm in hexane, toluene, chloroform, ethanol, acetonitrile, and ethanol/water 63/37 (v/v) and emission spectra ( $\lambda_{ex} = 307$  nm) of **1** at room temperature.
- **Figure S6**: Excitation ( $\lambda_{em} = 490$  nm) and emission ( $\lambda_{ex} = 396$  nm) spectra of **1** in ethanol/water mixtures (v/v) ( $l = 1$  cm, absorbance at  $396$  nm = 0.06).

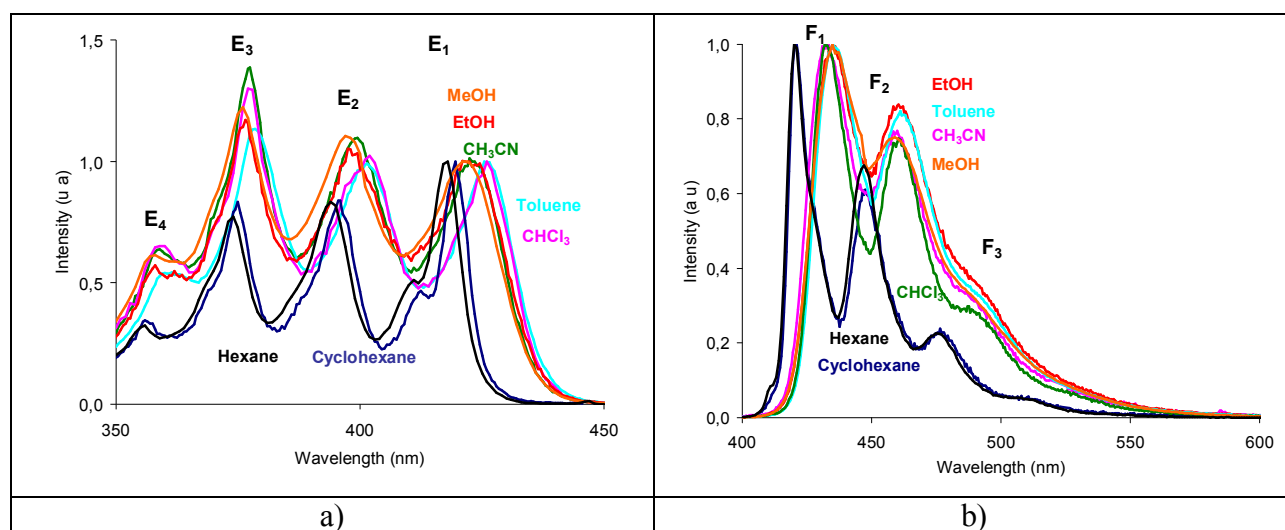

**Figure S1** : Excitation ( $\lambda_{em} = 420$  nm) and emission spectra ( $\lambda_{ex} = 260, 355, 380, 400, 400, 400, 410$  nm in acetonitrile, methanol, toluene, cyclohexane, ethanol, chloroform and hexane) of DCA at room temperature.

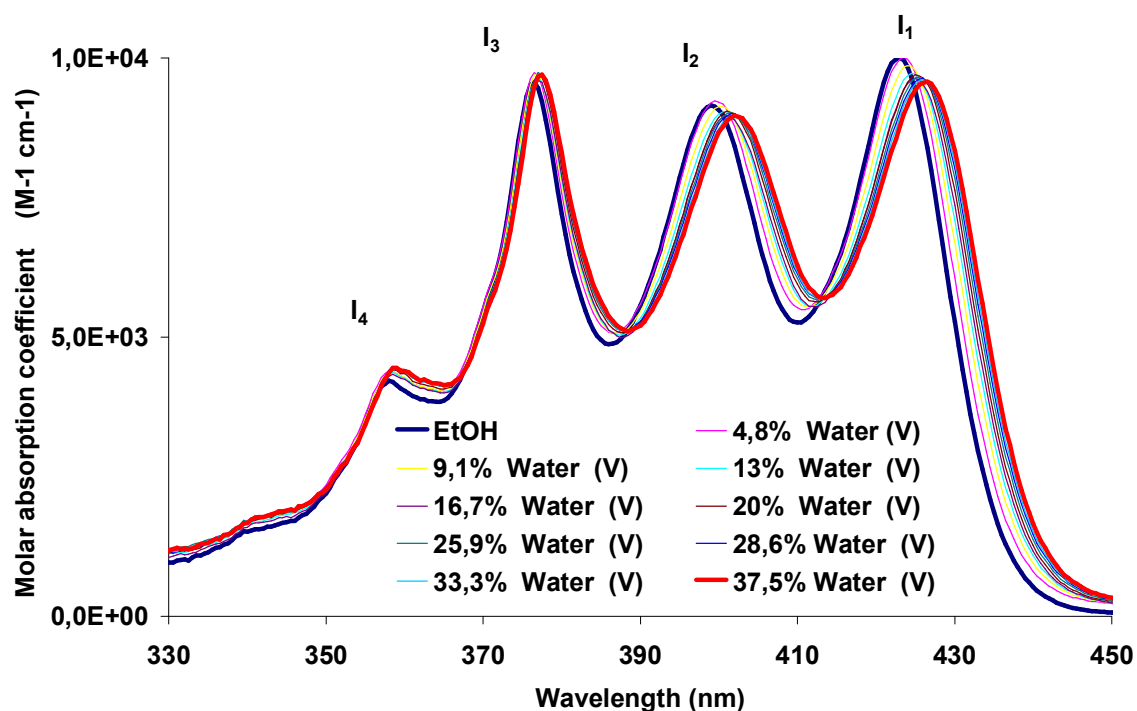

**Figure S2**: Electronic absorption spectra of DCA in ethanol/water mixtures (v/v) at room temperature.

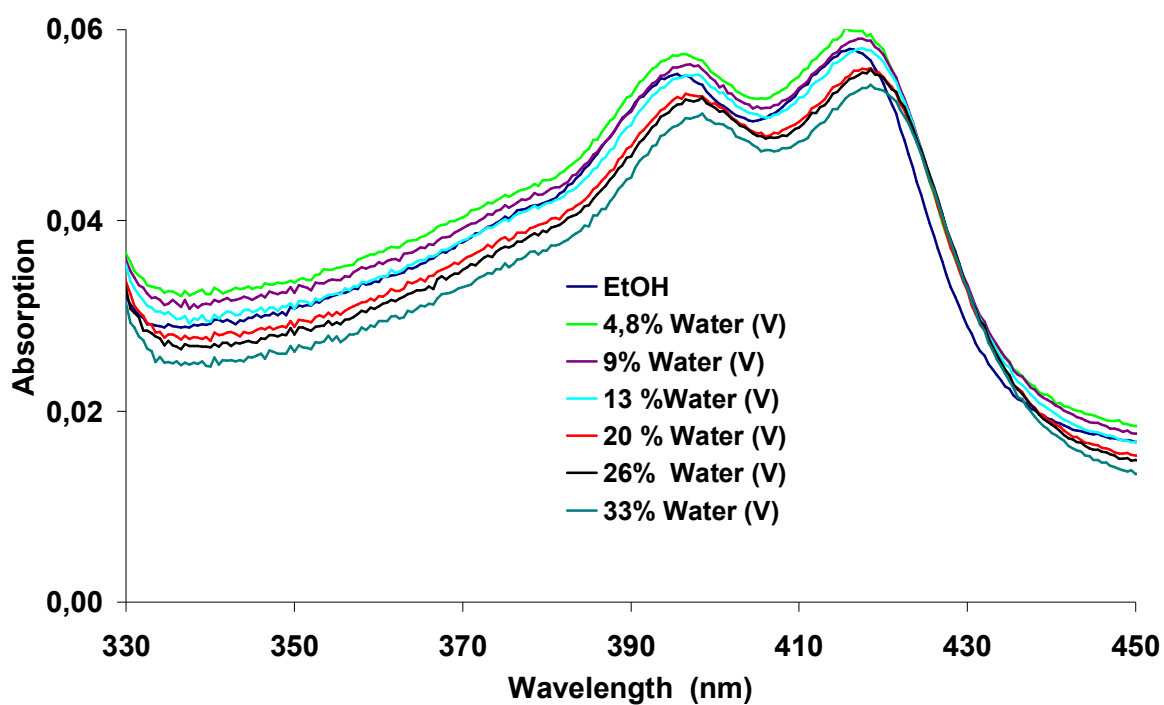

**Figure S3:** Absorption spectra of **1** in ethanol/water mixture (v/v) at room temperature, ( $l=1$  cm).

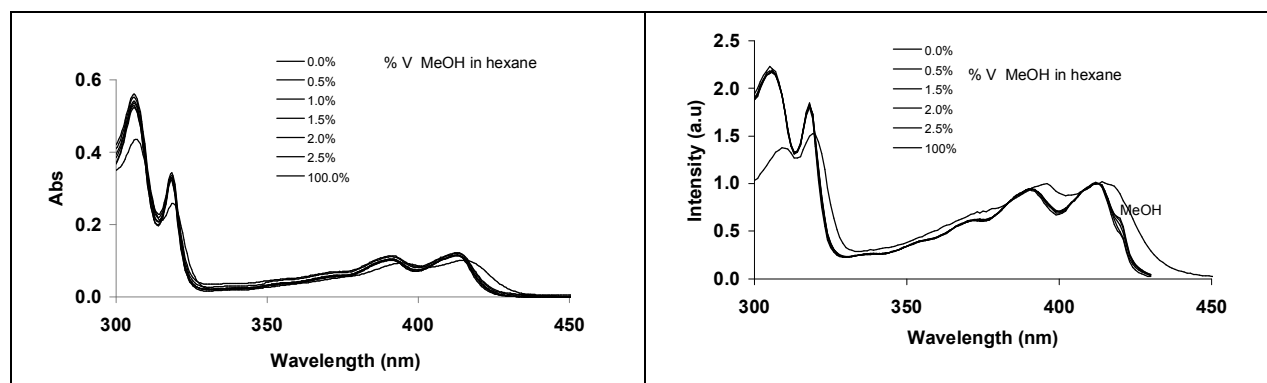

**Figure S4:** Absorption and excitation ( $\lambda_{em}=420$  nm) and spectra of **1** in hexane/methanol mixtures (v/v) ( $[1]=6.0 \times 10^{-6}$  M,  $l=1$  cm).

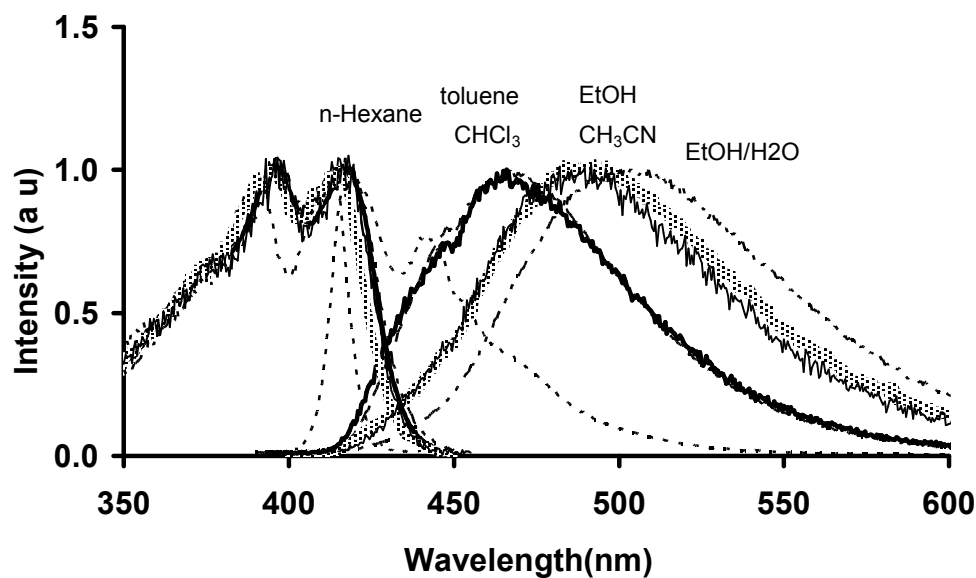

**Figure S5:** Excitation spectra ( $\lambda_{em} = 414, 440, 440, 466, 490, 490$  and  $550$  nm in hexane, toluene, chloroform, ethanol, acetonitrile, and ethanol/water 63/37 (v/v) and emission spectra ( $\lambda_{ex} = 307$  nm) of **1** at room temperature.

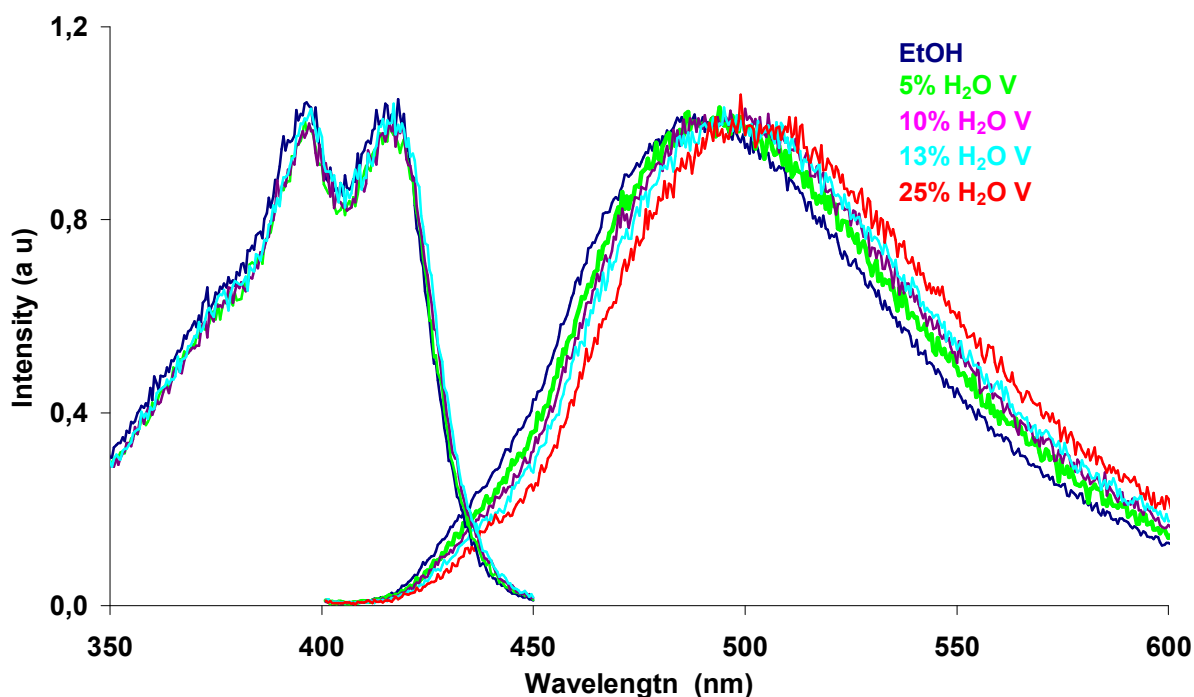

**Figure S6:** Excitation ( $\lambda_{em} = 490$  nm) and emission ( $\lambda_{ex} = 396$  nm) spectra of **1** in ethanol/water mixtures (v/v) ( $l = 1$  cm, absorbance at  $396$  nm =  $0.06$ ).
